# Supplementary material
Source: bioRxiv or medRxiv preprint supplement (https://www.biorxiv.org/highwire/filestream/110500/field_highwire_adjunct_files/0/362277-1.pdf)
Supplement: Supplementary file [file 362277-1.pdf]

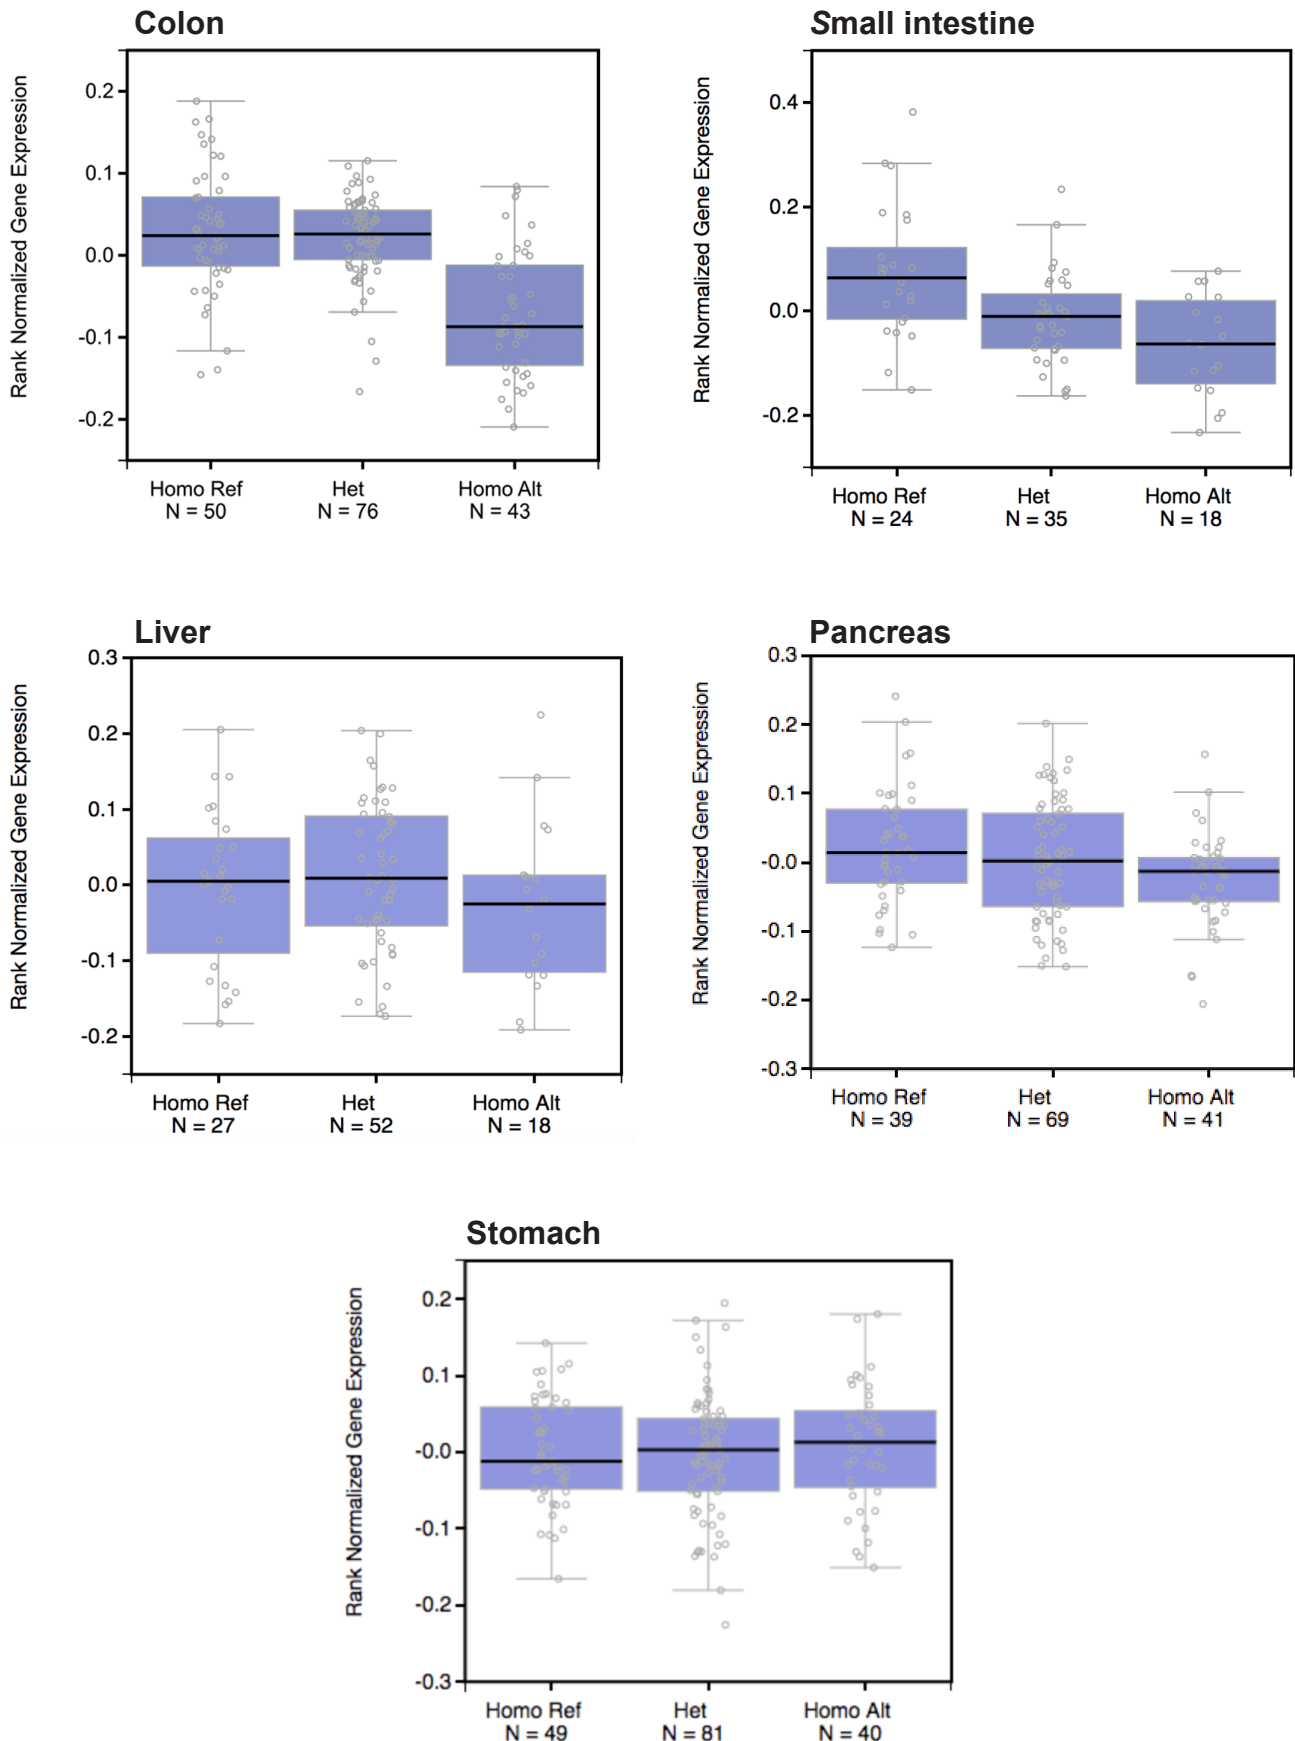

**Figure S1A. eQTL box plots of *rs1471633* and *PDZK1* expression in the indicated tissues.**

Variant *rs1471633* is directly adjacent to, and in complete linkage disequilibrium with, *rs1967017* ~4 kb upstream of the transcription start site for *PDZK1* (see figure 1C of main manuscript). Genotype association of *rs1471633* with *PDZK1* expression in the represented tissue types was retrieved from GTEx. P values were: colon,  $1.3 \times 10^{-11}$ ; small intestine,  $8.3 \times 10^{-7}$ ; stomach, 0.72; pancreas,  $2.4 \times 10^{-3}$ ; liver, 0.49. Reference allele is A (urate-increasing), alternate allele is C (urate-decreasing).
